# Supplementary material
Source: MDPI journal article supplement (https://www.mdpi.com/2071-1050/12/4/1437)
Supplement: s1 [file s1]

## Sheet: Instructions
Cosmetics sustainability calculator
A tool to assess the environmental and social impact of our products
					Instructions
						1) Select the raw materials to be used or used in the formulation, among the groups presented*
						2) Enter the amount of use of each raw material selected in %
						3) Regarding the production, start by selecting the source of energy used and then answer the following questions carefully (selecting yes or no)
						4) Concerning the packaging materials, select the material chosen
						5) In relation to, distribution and post-consumer use answer the following questions carefully (selecting yes or no)
						6) After everything is completed, check the % of sustainability of your product
						7) At the end, do not forget to reflect about the consumer use phase
						*If you do not use a raw material from one of the groups, select the option “No option”
						Now, are you ready?
						Click on Template and follow the instructions
						If you have doubts see the tutorial

## Sheet: Template
Cosmetics sustainability calculator
Date:
Name of the product:
Code:
Type of the product:
	SELECTION OF RAW MATERIALS	Amount of use (%)
	Emollients I
	Vegetable waxes
	Emollients II
	Vegetable waxes
	Emollients III
	No option
	Emulsifiers/Surfactants I
	Lecithin
	Emulsifiers/Surfactants II
	No option
	Hair Conditioners
	No option
	Polymers
	No option
	Solvents
	Glycerin
	Preservatives
	Food preservatives
	Fragrances
	Oleoresins
	Colorants
	No option
	UV filters
	No option
	pH adjustment
	No option
	Chelating Agents
	No option
	Exfoliators
	Plastic microbeads
	Water
	Water (30-60%)
		0
	PRODUCTION
	Select the energy source used:	Renewable
	Did you consider the energy consumption?	Yes
	Did you consider water consumption?	Yes
	Did you consider the manufacturing temperature?	Yes
	Did you consider production planning with total wastes minimization?	Yes
	Do cleaning procedures meet sustainability standards?	Yes
	Did you consider waste minimization?	Yes
	During manufacture, carry out an adequate control of emissions of polluting gases?	Yes
	Have you adopted an appropriate strategy so that there is no soil contamination?	Yes
	Have you adopted an appropriate strategy so that there is no water contamination?	Yes
	PACKAGING MATERIALS
	Select the packaging material used:	Biopolymers
	DISTRIBUTION
	Select the type of fuel used:	Alternatives to Diesel
	Did you consider the type of transport? (road, air, sea)	Yes
	Did you take into account the transportation miles?	Yes
	Did you consider the load of the transport vehicle?	Yes
	Did you consider the frequency of deliveries?	Yes
	POST-CONSUMER USE
	Did you consider the possible waste associated with packaging?	Yes
	Did you consider possible water contamination?	Yes
	Did you consider possible soil contamination?	Yes
	Did you consider environmental pollution?	Yes
	Did you consider possible impacts on biodiversity?	Yes
	Did you consider the biodegradability of packaging and raw materials?	Yes
	Did you consider the recyclability of the packaging?	Yes
	Did you consider packaging reuse?	Yes
	Sustainability (%)	0.51112

## Sheet: Auxiliary calculations
	Emollients I	Vegetable waxes	0.78125
	Emollients II	Vegetable waxes	0.78125
	Emollients III	No option	0
	Emulsifiers/Surfactants I	Lecithin	0.65625
	Emulsifiers/Surfactants II	No option	0
	Hair Conditioners	No option	0
	Polymers	No option	0
	Solvents	Glycerin	0.65625
	Preservatives	Food preservatives	0.625
	Fragrances	Oleoresins	0.70625
	Colorants	No option	0
	UV filters	No option	0
	pH adjustment	No option	0
	Chelating Agents	No option	0
	Exfoliators	Plastic microbeads	0.05
	Water	Water (30-60%)	0.5
	Calculo dos ingredientes	0
	Select the energy source used:	Renewable	0.78125
	Did you consider the energy consumption?	Yes	0.54375
	Did you consider water consumption?	Yes	0.55625
	Did you consider the manufacturing temperature?	Yes	0.575
	Did you consider production planning with total wastes minimization?	Yes	0.6375
	Do cleaning procedures meet sustainability standards?	Yes	0.63125
	Did you consider waste minimization?	Yes	0.59375
	During manufacture, carry out an adequate control of emissions of polluting gases?	Yes	0.55625
	Have you adopted an appropriate strategy so that there is no soil contamination?	Yes	0.54375
	Have you adopted an appropriate strategy so that there is no water contamination?	Yes	0.5375
	Calculo da produção	0.116768
	Select the packaging material used:	Biopolymers	0.7375
	Calculo do material	0.147235
	Select the type of fuel used:	Alternatives to Diesel	0.70625
	Did you consider the type of transport? (road, air, sea)	Yes	0.54375
	Did you take into account the transportation miles?	Yes	0.5375
	Did you consider the load of the transport vehicle?	Yes	0.525
	Did you consider the frequency of deliveries?	Yes	0.50625
	Calculo da distribuição	0.124208
	Did you consider the possible waste associated with packaging?	Yes	0.525
	Did you consider possible water contamination?	Yes	0.49375
	Did you consider possible soil contamination?	Yes	0.46875
	Did you consider environmental pollution?	Yes	0.4625
	Did you consider possible impacts on biodiversity?	Yes	0.49375
	Did you consider the biodegradability of packaging and raw materials?	Yes	0.79375
	Did you consider the recyclability of the packaging?	Yes	0.83125
	Did you consider packaging reuse?	Yes	0.8125
	Calculo pós-vida	0.122909

## Sheet: Ciclo de vida
		Design	Raw materials selection	Production	Packaging	Distribution	Consumer use	Post-consumer use
		2	5	3	4	2	3	4
		5	5	4	5	4	2	4
		5	3	3	3	3	4	3
		1	3	1	3	2	2	2
		5	5	5	5	5	4	4
		2	2	2	2	2	2	2
		2	2	2	1	1	1	1
		3	1	2	1	3	4	2
		3	4	3	4	4	4	3
		5	5	5	5	3	3	4
		2	2	1	1	1	2	2
		5	3	5	4	5	4	5
		5	5	5	5	5	5	5
		5	5	3	5	4	4	5
		5	5	5	5	3	3	5
		4	5	3	3	2	3	3
		5	2	5	1	4	5	1
		4	5	4	3	3	4	4
		5	5	4	5	3	4	5
		5	5	4	5	4	4	5
		4	5	5	4	2	2	4
		3	5	3	5	3	5	5
		5	5	5	5	4	2	5
		1	1	1	1	0	0	1
		4	5	4	4	4	4	4
		5	5	2	0	2	4	2
		4	4	3	3	3	2	3
		4	5	5	5	5	5	5
		1	1	1	1	1	1	1
		5	5	4	5	4	3	4
		4	4	4	4	4	5	5
		5	4	3	4	3	4	4	Soma
	Média	3.84375	3.9375	3.40625	3.46875	3.0625	3.25	3.5	24.4688
	%	0.157088	0.16092	0.139208	0.141762	0.12516	0.132822	0.14304
									17.375
	Impacto (%)		0.226619	0.196043	0.19964	0.176259		0.201439

## Sheet: Tensioactivos
	Silicone and PEG emulsifiers	Fatty acids	Fatty alcohols	Lecithin	Sulfates	Sulfonic acids	Phosphoric acid derivatives	Quaternary ammonium compounds	Zwitterionic	Polysorbates
	1	4	4	3	1	3	3	1	3	3
	1	5	4	5	0	1	1	1	1	4
	4	4	3	2	1	1	1	1	1	2
	2	2	2	2	2	2	2	2	2	2
	1	5	3	5	0	1	0	0	2	1
	0	1	1	1	1	1	1	0	0	1
	1	1	1	1	1	1	1	1	1	1
	0	2	2	1	1	1	1	1	1	1
	4	4	3	3	3	3	3	3	3	3
	5	3	3	4	5	5	5	5	5	5
	0	2	2	4	0	0	2	0	0	2
	1	5	5	4	5	5	5	3	5	5
	4	4	4	4	4	4	4	4	4	4
	1	4	4	4	1	2	2	2	2	2
	3	3	3	5	3	3	3	3	3	3
	2	3	3	3	2	3	3	1	2	3
	2	2	2	4	3	3	3	1	2	2
	4	4	4	4	4	4	4	4	4	4
	0	5	5	5	0	0	2	1	1	4
	0	0	3	3	0	1	0	1	1	0
	5	2	3	3	4	4	4	5	4	3
	1	3	2	3	0	1	1	1	0	2
	1	3	3	3	2	1	1	1	1	1
	5	4	5	3	5	4	4	4	4	3
	0	5	5	5	0	0	0	0	0	0
	2	4	3	5	2	2	3	1	2	2
	3	2	2	2	3	3	3	3	3	3
	1	4	3	4	0	0	0	0	0	0
	0	4	1	0	0	0	0	0	0	0
	5	4	4	4	4	4	4	4	4	4
	3	3	3	3	3	3	3	4	4	3
	1	4	3	3	0	2	2	2	2	2	Soma
Média	1.96875	3.28125	3.0625	3.28125	1.875	2.125	2.21875	1.875	2.09375	2.34375	24.125
Impacto (%)	0.39375	0.65625	0.6125	0.65625	0.375	0.425	0.375	0.375	0.41875	0.46875	5

## Sheet: Condicionadores
	Vegetable extracts	Quaternary ammonium compounds	Silicones	Polymers
	5	1	1	3
	4	1	1	2
	5	1	4	3
	3	3	3	3
	5	0	1	1
	1	0	0	0
	4	3	4	4
	1	1	1	1
	4	2	2	3
	5	5	5	4
	5	0	0	2
	2	3	1	4
	3	4	4	4
	5	2	2	2
	5	3	3	3
	4	1	1	4
	4	1	1	2
	4	4	4	4
	5	1	0	3
	5	1	0	2
	1	4	5	4
	2	1	1	3
	4	1	1	2
	1	4	5	4
	5	0	0	0
	5	2	2	4
	2	3	3	3
	4	0	1	2
	4	0	0	2
	2	4	5	3
	4	4	4	4
	4	2	2	2	Soma
Média	3.65625	1.9375	2.09375	2.71875	10.4062
Impacto (%)	0.73125	0.3875	0.41875	0.54375	5

## Sheet: Polímeros
	Carbomers	Silicone-based polymers	Gums	Biopolymers
	3	0	4	5
	2	1	5	5
	3	3	4	4
	3	3	3	3
	0	0	5	5
	0	0	1	0
	4	4	4	4
	1	1	2	1
	3	3	4	4
	4	5	5	5
	2	0	4	5
	1	1	5	5
	3	3	3	3
	2	2	5	5
	3	3	5	5
	4	3	3	4
	2	1	4	5
	4	4	5	5
	2	1	5	5
	1	0	4	5
	4	5	2	1
	3	1	4	4
	3	1	3	4
	3	5	2	1
	0	0	5	5
	1	2	4	4
	2	3	2	2
	1	0	4	5
	5	0	5	5
	4	5	3	2
	4	3	4	4
	2	1	4	4	Soma
Média	2.46875	2	3.8125	3.875	12.1562
Impacto (%)	0.49375	0.4	0.7625	0.775	5

## Sheet: Solventes
	Glycols	Glycerin	Ethanol
	0	2
	3	4
	2	4
	3	3
	1	4
	1	2
	3	3
	2	2
	3	3
	3	3
	0	4
	4	5
	4	3
	0	4
	3	3
	3	4
	3	5
	4	4
	3	5
	2	4
	4	2
	1	3
	1	4
	5	2
	0	5
	4	4
	3	2
	2	2
	1	1
	3	3
	4	3
	2	3		Soma
Média	2.40625	3.28125		5.6875
Impacto (%)	0.48125	0.65625		5

## Sheet: Conservantes
	Parabens	Imidazolydinil urea and Diazolydinil urea	DMDM (dimethyloldimethylhydantoin) hydantoin	2-bromo-2-nitropropanel, 3-diol	Essential oils	Glycols	Food preservatives
	2	2	2	2	5	2	4
	1	1	1	1	2	3	2
	2	2	2	2	4	2	2
	2	2	2	2	2	2	2
	0	0	0	0	5	1	4
	0	0	0	0	2	0	1
	4	4	4	4	5	5	5
	0	1	1	1	4	1	2
	3	3	2	2	3	3	2
	5	3	5	5	5	3	5
	0	0	0	0	4	3	3
	5	2	2	2	2	5	5
	4	4	4	4	4	4	4
	1	1	1	2	5	1	5
	3	3	3	3	5	3	3
	3	3	3	3	4	4	3
	2	2	2	1	5	3	3
	4	4	4	4	4	4	4
	1	2	1	1	4	3	5
	1	3	0	0	5	2	3
	4	5	4	4	1	3	1
	0	1	2	1	1	1	0
	4	1	1	1	4	1	1
	4	5	4	4	1	2	5
	0	0	0	0	5	5	5
	3	2	2	2	5	4	4
	3	3	3	3	2	2	2
	0	0	2	0	2	0	2
	0	2	1	0	1	1	1
	3	3	3	3	2	2	3
	3	4	4	4	4	4	5
	1	2	3	2	5	2	4	Soma
Média	2.125	2.1875	2.125	1.96875	3.5	2.53125	3.125	17.5625
Impacto (%)	0.425	0.4375	0.425	0.39375	0.7	0.50625	0.625	5

## Sheet: Fragrâncias
	Synthethic fragrances	Essential oils	Oleoresins
	1	5	5
	2	2	3
	1	4	4
	2	2	2
	0	5	5
	0	2	1
	3	3	3
	2	4	4
	3	4	4
	3	5	5
	0	3	5
	3	3	5
	3	3	3
	1	4	3
	3	5	5
	3	4	4
	1	4	4
	4	4	4
	1	4	1
	0	4	2
	4	1	2
	0	4	5
	1	4	4
	5	1	1
	0	5	3
	0	5	5
	3	2	2
	3	2	3
	0	1	4
	4	2	4
	2	3	3
	1	4	5	Soma
Média	1.84375	3.375	3.53125	8.75
Impacto (%)	0.36875	0.675	0.70625	5

[truncated: 12 more sheets: Cores, Filtros UV, Ajuste de pH, Agentes Quelantes, Produção, Excluido, Materiais Embalagem, Distribuição, Fase pós-consumo, Água, Resultados, Emolientes]
